# Supplementary material for: Effects of Inpatient Occupational Rehabilitation vs. Outpatient Acceptance and Commitment Therapy on Sick Leave and Cost of Lost Production: 7-Year Follow-Up of a Randomized Controlled Trial
Source: Springer Nature journal article supplement (doi:10.1007/s10926-024-10195-x), 2024-04-28
Supplement: MOESM1 [file 10926_2024_10195_MOESM1_ESM.pdf]

## Online supplementary material

**Table S1:** Annual status update on medical benefits, retirement, and deaths, presented as percentages (and counts, n).

|                                             | Status                              |             |                                 |                                                                       |                                                    |         |       |
|---------------------------------------------|-------------------------------------|-------------|---------------------------------|-----------------------------------------------------------------------|----------------------------------------------------|---------|-------|
|                                             | No medical<br>benefits<br>(working) | Sick listed | Work<br>assessment<br>allowance | Graded<br>permanent<br>disability<br>benefits<br>(<100%) <sup>a</sup> | Full permanent<br>disability<br>benefits<br>(100%) | Retired | Dead  |
| <b>Rehabilitation<br/>start<sup>b</sup></b> |                                     |             |                                 |                                                                       |                                                    |         |       |
| I-MORE                                      | 1 (1)                               | 91 (75)     | 7 (6)                           |                                                                       |                                                    |         |       |
| O-ACT                                       |                                     | 92 (73)     | 8 (6)                           |                                                                       |                                                    |         |       |
| <b>Year 1</b>                               |                                     |             |                                 |                                                                       |                                                    |         |       |
| I-MORE                                      | 43 (35)                             | 13 (11)     | 44 (36)                         |                                                                       |                                                    |         |       |
| O-ACT                                       | 33 (26)                             | 4 (3)       | 63 (50)                         |                                                                       |                                                    |         |       |
| <b>Year 2</b>                               |                                     |             |                                 |                                                                       |                                                    |         |       |
| I-MORE                                      | 46 (38)                             | 13 (11)     | 35 (29)                         | 2 (2)                                                                 | 2 (2)                                              |         |       |
| O-ACT                                       | 41 (32)                             | 6 (5)       | 46 (36)                         | 4 (3)                                                                 | 4 (3)                                              |         |       |
| <b>Year 3</b>                               |                                     |             |                                 |                                                                       |                                                    |         |       |
| I-MORE                                      | 49 (40)                             | 17 (14)     | 21 (17)                         | 9 (7)                                                                 | 5 (4)                                              |         |       |
| O-ACT                                       | 48 (38)                             | 5 (4)       | 23 (18)                         | 13 (10)                                                               | 10 (8)                                             |         | 1 (1) |
| <b>Year 4</b>                               |                                     |             |                                 |                                                                       |                                                    |         |       |
| I-MORE                                      | 45 (37)                             | 13 (11)     | 20 (16)                         | 10 (8)                                                                | 11 (9)                                             |         | 1 (1) |
| O-ACT                                       | 43 (34)                             | 11 (9)      | 16 (13)                         | 13 (10)                                                               | 14 (11)                                            |         | 3 (2) |
| <b>Year 5</b>                               |                                     |             |                                 |                                                                       |                                                    |         |       |
| I-MORE                                      | 45 (37)                             | 12 (10)     | 7 (6)                           | 15 (12)                                                               | 20 (16)                                            |         | 1 (1) |
| O-ACT                                       | 44 (35)                             | 10 (8)      | 8 (6)                           | 11 (9)                                                                | 24 (19)                                            |         | 3 (2) |
| <b>Year 6</b>                               |                                     |             |                                 |                                                                       |                                                    |         |       |
| I-MORE                                      | 38 (31)                             | 16 (13)     | 10 (8)                          | 16 (13)                                                               | 20 (16)                                            |         | 1 (1) |
| O-ACT                                       | 41 (32)                             | 14 (11)     | 4 (3)                           | 11 (9)                                                                | 28 (22)                                            |         | 3 (2) |
| <b>Year 7</b>                               |                                     |             |                                 |                                                                       |                                                    |         |       |
| I-MORE                                      | 40 (33)                             | 13 (11)     | 6 (5)                           | 16 (13)                                                               | 21 (17)                                            | 1 (1)   | 2 (2) |
| O-ACT                                       | 29 (23)                             | 14 (11)     | 9 (7)                           | 13 (10)                                                               | 28 (22)                                            | 5 (4)   | 3 (2) |

Abbreviations: I-MORE: inpatient multimodal occupational rehabilitation; O-ACT: outpatient acceptance and commitment therapy

<sup>a</sup> Only new disability benefits during follow-up are considered. At inclusion, 12 participants received graded disability benefits (I-MORE n=9; O-ACT n=3); they are registered as part-time workers with corresponding benefits.

<sup>b</sup> Benefits status the month the participant started rehabilitation. There are some small differences from table 1 which shows status at inclusion in the study.

a)

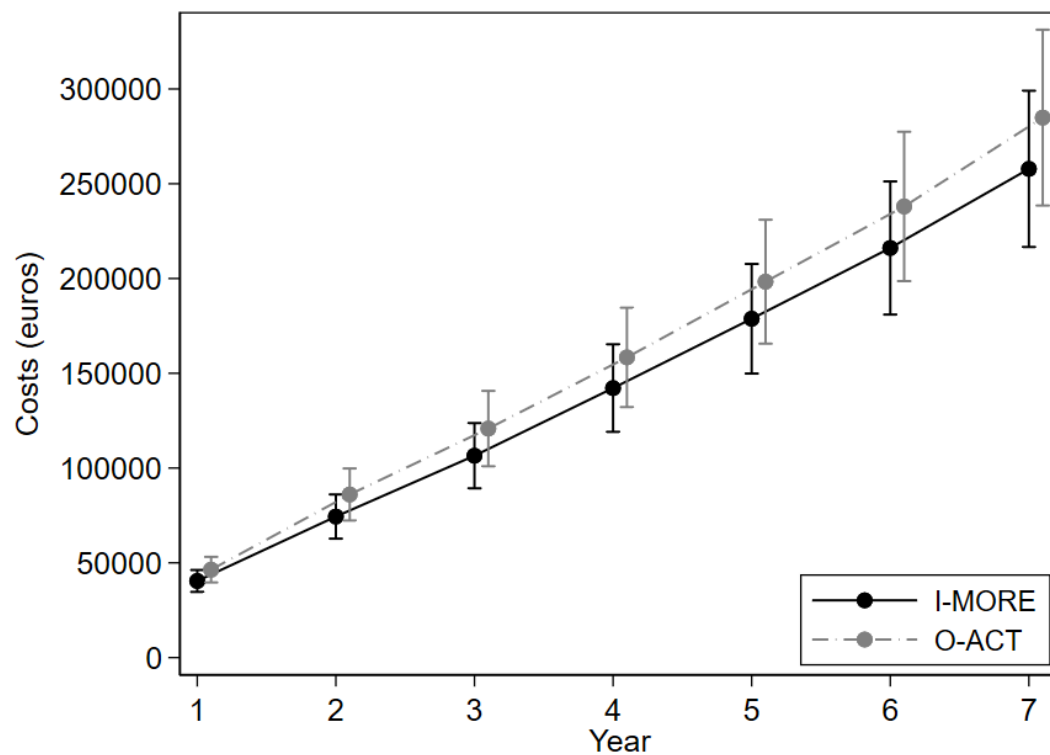

b)

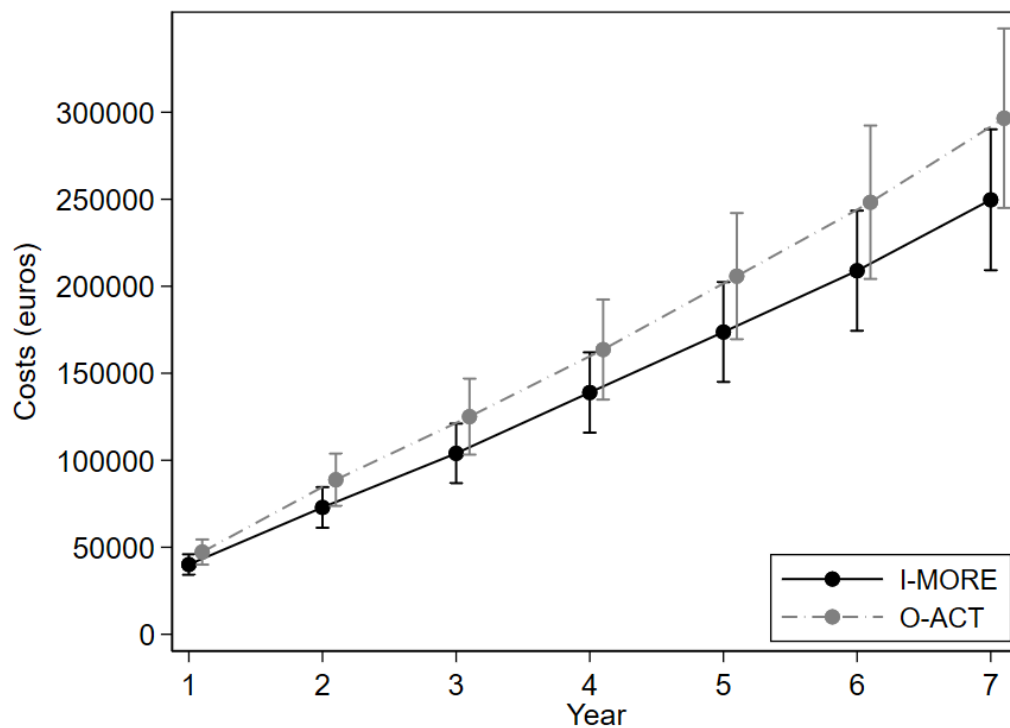

**Figure S1** Cumulative costs (in euros) for the inpatient (I-MORE)- and the outpatient program (O-ACT) during 7 years of follow-up. a) unadjusted; b) adjusted for age, sex, education, and main sick leave diagnosis.
